# Supplementary material for: Dynamic interplay of flow and collagen stabilizes primary hepatocytes culture in a microfluidic platform
Source: Royal Society of Chemistry journal article supplement (doi:10.1039/c4lc00071d), 2014-01-01
Supplement: c4lc00071d1.pdf [file c4lc00071d1.pdf]

**Dynamic Interplay of Flow and Collagen Stabilizes Primary Hepatocytes Culture in a Microfluidic Platform**

Manjunath Hegde\*, Ph.D., Rohit Jindal\*#, Ph.D., Abhinav Bhushan\*, Ph.D., Shyam Sundhar Bale, Ph.D., William J McCarty, Ph.D., Inna Golberg, B.S., O. Berk Usta, Ph.D., Martin L. Yarmush#, M.D., Ph.D.

Center for Engineering in Medicine (CEM) at Massachusetts General Hospital, Harvard Medical School, Shriners Hospital for Children, Boston MA 02114

\*Equal contribution

#corresponding authors

Dr. Rohit Jindal  
Center for Engineering in Medicine (CEM)  
Massachusetts General Hospital, Harvard Medical School  
Shriners Hospital for Children  
51 Blossom Street  
Boston, MA 02114  
E-mail: [rjindal@mgh.harvard.edu](mailto:rjindal@mgh.harvard.edu)

Dr. Martin L. Yarmush  
Center for Engineering in Medicine (CEM)  
Massachusetts General Hospital, Harvard Medical School  
Shriners Hospital for Children  
51 Blossom Street  
Boston, MA 02114  
E-mail: [ireis@sbi.org](mailto:ireis@sbi.org)

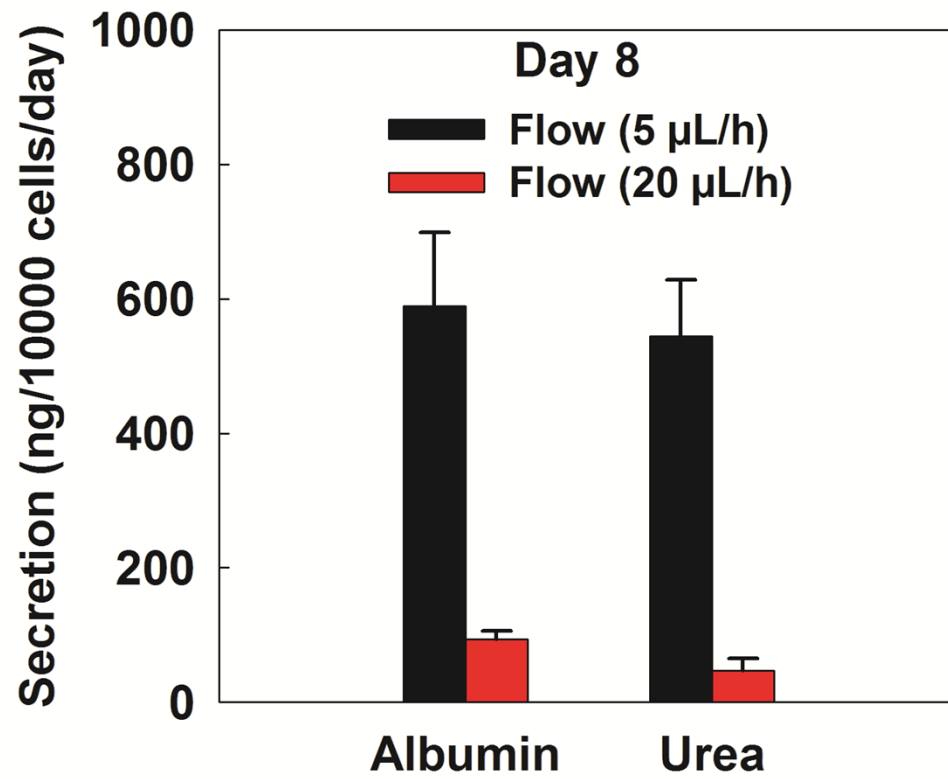

**Figure S1:** Albumin and urea secretion by hepatocytes on day 8 of culture. The media flow rate was maintained at 5 or 20 µl/hour.

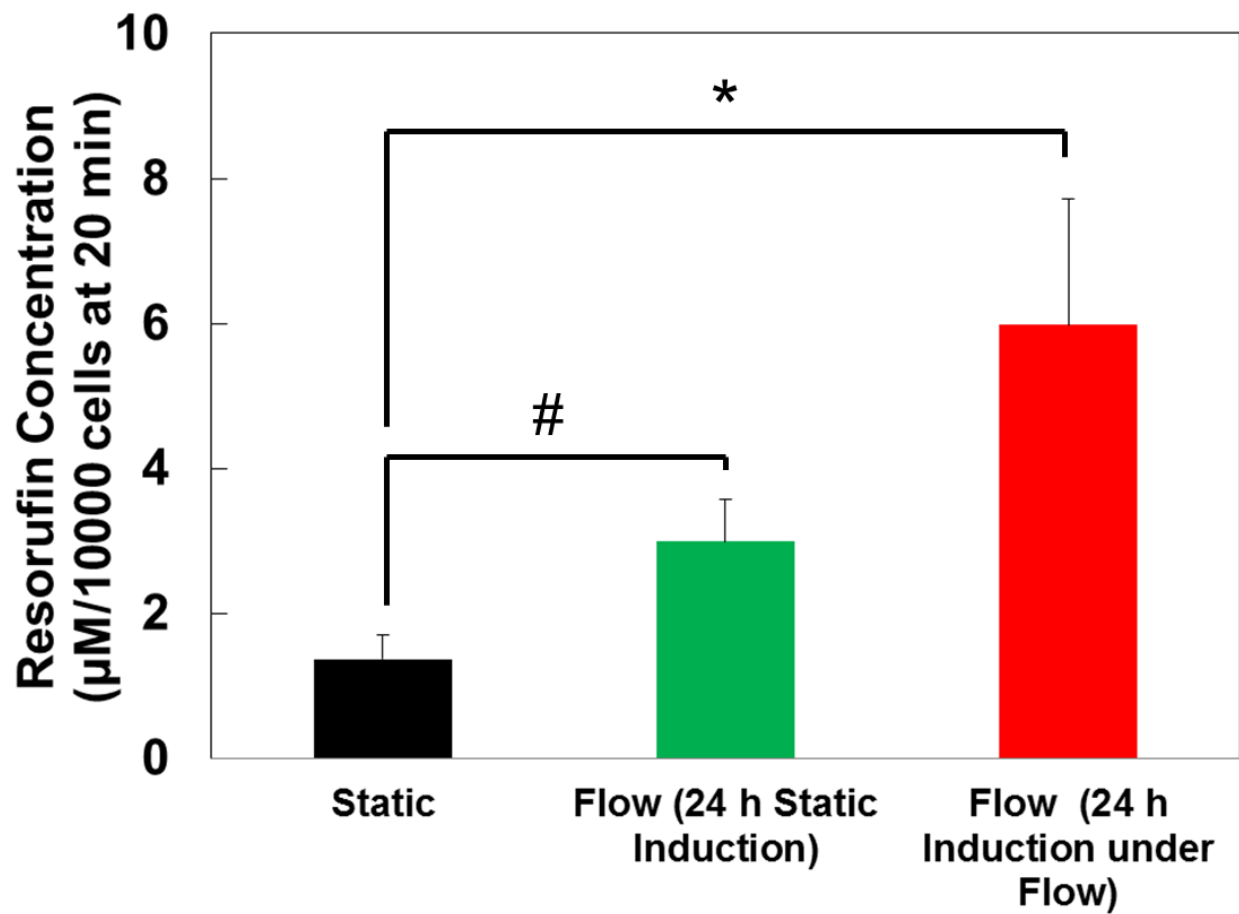

**Figure S2:** CYP1A1 activities assessed on Day 7 by induction of hepatocyte cultures with 3-methylcholanthrene (3-MC) in media show that static cultures exposed to 3-MC for 24 hours have significantly less CYP 1A1 activity compared to flow devices, induction either done by continuous perfusion of 3-MC for 24 hours such that the amount of 3-MC exposed to the cells were similar to the static devices, or by static induction with 2µM 3-MC for 24 hours. \* $p < 0.01$ , # $p < 0.05$ .
